# Supplementary material for: Interleukin-17D promotes lung cancer progression by inducing tumor-associated macrophage infiltration via the p38 MAPK signaling pathway
Source: publisher site journal article supplement (doi:10.18632/aging.204208), 2022-08-05
Supplement: Supplementary file [file aging-v14i15-204208-supplementary-material-SD2.pdf]

## SUPPLEMENTARY TABLE

Supplementary Table 1. Primer sequences.

| <b>Primers used for qRT-PCR</b>                     |                                                                       |
|-----------------------------------------------------|-----------------------------------------------------------------------|
| <i>mGapdh</i> -F                                    | 5'ACTCCACTCACGGCAAATTCAACG3'                                          |
| <i>mGapdh</i> -R                                    | 5'TCTCGTGGTTCACACCCATCACAA3'                                          |
| <i>mCsf1</i> -F                                     | 5'GCCTCCTGTTCTACAAGTGGAAG3'                                           |
| <i>mCsf1</i> -R                                     | 5'ACTGGCAGTTCACCTGTCTGT3'                                             |
| <i>mCsf2</i> -F                                     | 5'CTCACCTGCTGCTACTCATT3'                                              |
| <i>mCsf2</i> -R                                     | 5'ACTACAGCTTCTTTGGGACAC3'                                             |
| <i>mCcl2</i> -F                                     | 5'GGAGAGCTACAAGAGGATCAC3'                                             |
| <i>mCcl2</i> -R                                     | 5'GTATGTCTGGACCCATTCTTC3'                                             |
| <i>mCcl3</i> -F                                     | 5'GAAGATTCCACGCCAATTCATC3'                                            |
| <i>mCcl3</i> -R                                     | 5'GATCTGCCGGTTTCTCTTAGTC3'                                            |
| <i>mCcl4</i> -F                                     | 5'AGCTCTGTGCAAACCTAACC3'                                              |
| <i>mCcl4</i> -R                                     | 5'GGTGTAAGAGAAACAGCAGGAA3'                                            |
| <i>mCcl5</i> -F                                     | 5'GAGTATTTCTACACCAGCAGCA3'                                            |
| <i>mCcl5</i> -R                                     | 5'CCACTTCTTCTCTGGGTTGG3'                                              |
| <i>mIl6</i> -F                                      | 5'TACCACTTCACAAGTCGGAGGC3'                                            |
| <i>mIl6</i> -R                                      | 5'CTGCAAGTGCATCATCGTTGTTC3'                                           |
| <i>hGAPDH</i> -F                                    | 5'GGTGGTCTCCTCTGACTTCAACA3'                                           |
| <i>hGAPDH</i> -R                                    | 5'GTTGCTGTAGCCAAATTCGTTGT3'                                           |
| <i>hCSF1</i> -F                                     | 5'TGAGACACCTCTCCAGTTGCTG3'                                            |
| <i>hCSF1</i> -R                                     | 5'GCAATCAGGCTTGGTCACCACA3'                                            |
| <i>hCSF2</i> -F                                     | 5'CTGCTGCTGAGATGAATGAAAC3'                                            |
| <i>hCSF2</i> -R                                     | 5'CCCTTGAGCTTGGTGAGG3'                                                |
| <i>hCCL2</i> -F                                     | 5'AGCAAGTGTCCTCAAAGAAGC3'                                             |
| <i>hCCL2</i> -R                                     | 5'CATGGAATCCTGAACCCACT3'                                              |
| <i>hCCL3</i> -F                                     | 5'TGCATCACTTGCTGCTGACA3'                                              |
| <i>hCCL3</i> -R                                     | 5'CTTCTGGACCCCTCAGGCACT3'                                             |
| <i>hCCL4</i> -F                                     | 5'CTCATGCTAGTAGCTGCCTTC3'                                             |
| <i>hCCL4</i> -R                                     | 5'GGC TGCTGGTCTCATAGTAATC3'                                           |
| <i>hCCL5</i> -F                                     | 5'ACAGGTACCATGAAGGTCTCC3'                                             |
| <i>hCCL5</i> -R                                     | 5'GCAAATTTGTGTAAGTTCAGG3'                                             |
| <i>hIL6</i> -F                                      | 5'GGAGACTTGCCTGGTGAAA3'                                               |
| <i>hIL6</i> -R                                      | 5'CTGGCTTGTTCTCACTACTC3'                                              |
| <b>Primers used for amplifying <i>IL17D</i> ORF</b> |                                                                       |
| <i>IL17D</i> -ORF-F                                 | 5'CGGGATCCATGGATTACAAGGATGACGACGATAAGCTGGTAGCCGGCTTC3'                |
| <i>IL17D</i> -ORF-R                                 | 5'CGGGATCCTCAGGGGCCAGCGGGCGCGT3'                                      |
| <b>shRNA sequences for <i>IL17D</i></b>             |                                                                       |
| <i>shIL17D</i> -501                                 | 5'GATCCCCAGACAGCATCAACTCCAGCATTTCAAGAGAATGCTGGAGTTGATGCTGTCTTTTTTA3'  |
| <i>shIL17D</i> -301                                 | 5'AGCTTAAAAAAGACAGCATCAACTCCAGCATTCTCTTGAAATGCTGGAGTTGATGCTGTCTGG G3' |
| <i>shIL17D</i> -502                                 | 5'GATCCCCCTGTCTACATGCCACCGTTTCAAGAGAACGGTGGGCATGTAGACAGGGTTTTTA3'     |
| <i>shIL17D</i> -302                                 | 5'AGCTTAAAAACCCTGTCTACATGCCACCGTTCTCTTGAAACGGTGGGCATGTAGACAGGGGGG3'   |
